# Supplementary material
Source: PubMed Central journal article supplement (PMC2217652)
Supplement: plntcell_tpc.107.051896_1.pdf [file plntcell_tpc.107.051896_1.pdf]

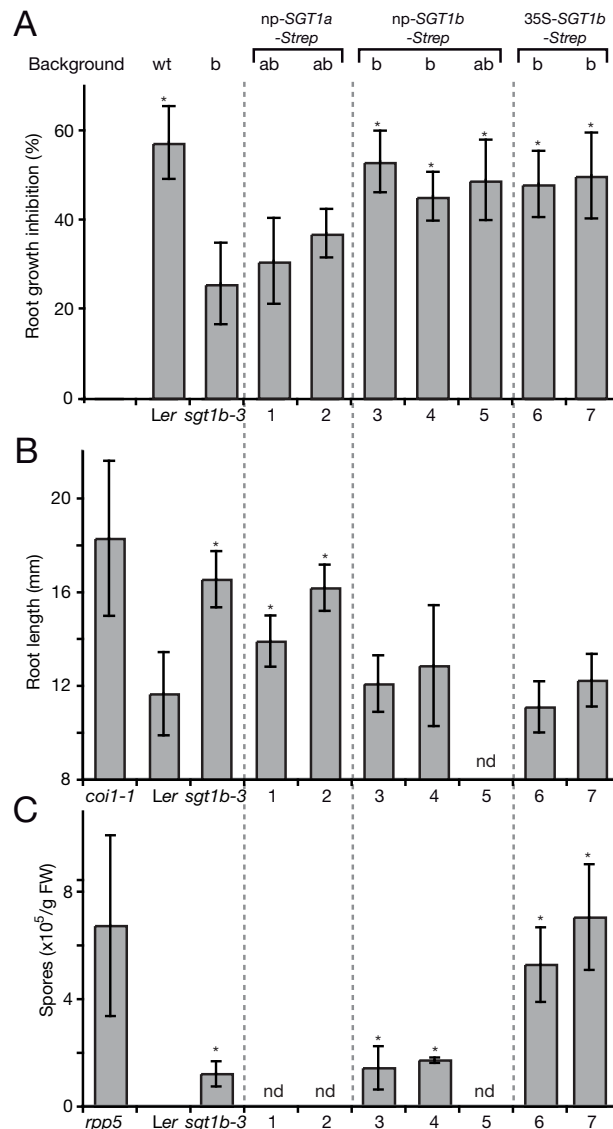

**Supplemental Figure 1 online.** Functionality tests of StrepII-tagged SGT1 proteins in transgenic *Arabidopsis* described in Figure 1. Plants 1/2, 3/4 and 6/7 indicate independent transgenic lines. Line 5 is derived from a cross between a Ler/Ws-0 hybrid *sgt1b-3/sgt1b-3 sgt1a-1/SGT1a* and plant 4. Background refers to the *SGT1* alleles: wt, wild type *SGT1a* and *SGT1b*; a, homozygous *sgt1a-1*; b, homozygous *sgt1b-3*; ab, double *sgt1a-1 sgt1b-3* homozygotes; nd, not determined.

**(A)** Root growth inhibition on 0,075 $\mu$ M 2-4D. \*, statistically significant differences for values compared with Ler *sgt1b-3* mutant as determined by student's *t*-test ( $p < 0,001$ ).

**(B)** Root growth was measured three days after transfer on 10  $\mu$ M methyl jasmonate.  $n > 10$  for each data point. Errors bars indicate standard errors. \*, statistically significant differences for values compared with wild type Ler as determined by student's *t*-test ( $p < 0,005$ ).

**(C)** *RPP5* gene-mediated resistance assays were performed using *H. parasitica* avirulent isolate Noco2 on two-week-old *Arabidopsis* seedlings. Spores were counted 6 dpi. One representative experiment from three is shown. Each data point represents the average of triplicate measurements and errors bars indicate standard errors. \*, statistically significant differences for values compared with wild type Ler as determined by student's *t*-test ( $p < 0,05$ ).

**A**

|         |     | m/z   | (charge) |                                                                                         |
|---------|-----|-------|----------|-----------------------------------------------------------------------------------------|
| HSC70-1 | T10 | 615,8 | (2)      | F S D S S V Q S D <b>M</b> K                                                            |
| HSC70-2 | T10 | 556,2 | (2)      | F S D <b>A</b> S V Q S D <b>R</b>                                                       |
| HSC70-3 | T10 | 613,8 | (2)      | <b>F</b> <b>T</b> D S S V Q S D <b>I</b> K                                              |
| HSC70-4 | T10 | 555,2 | (2)      | <b>Y</b> S D <b>P</b> S V Q A D <b>K</b> <b>S</b>                                       |
| HSC70-5 | T11 | 635,0 | (3)      | F S D <b>P</b> S V Q S D <b>I</b> <b>L</b> <b>H</b> <b>W</b> <b>P</b> <b>F</b> <b>K</b> |

  

**B**

|         |     | m/z   | (charge) |                                                     |
|---------|-----|-------|----------|-----------------------------------------------------|
| HSC70-1 | T16 | 653,8 | (2)      | E I A E A <b>Y</b> L G <b>V</b> <b>T</b> <b>I</b> K |
| HSC70-2 | T15 | 639,8 | (2)      | E I A E A F L G T T V K                             |
| HSC70-3 | T16 | 654,8 | (2)      | E I A E A <b>Y</b> L G T T <b>I</b> K               |
| HSC70-4 | T16 | 630,8 | (2)      | E I A E A F L G <b>S</b> <b>P</b> V K               |
| HSC70-5 | T16 | 496,2 | (2)      | <b>V</b> A E A F L G <b>R</b>                       |

**Supplemental Figure 2 online.** Mass fingerprinting of two peptides discriminating between cytosolic HSC70 isoforms

The polymorphic tryptic peptides (T) corresponding to T10 (**A**) and T16 (**B**) of HSC70-1 were used to identify specifically different cytosolic HSC70 isoforms. Corresponding peptides of HSC70-2 to -5 were aligned and polymorphic amino acids indicated by black shading. Predicted mass/charge values and charge are indicated.

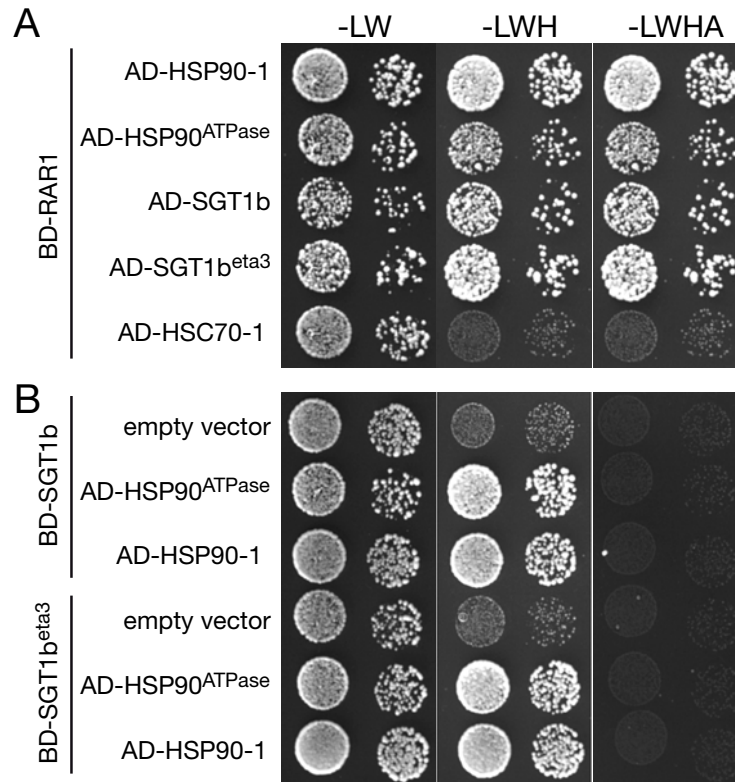

**Supplemental Figure 3 online.** Interaction studies between SGT1 and RAR1 or HSP90-1 using the Clontech Matchmaker™ GAL4 yeast two-hybrid system. Different dilutions were plated on SD medium lacking Leucine (L), Tryptophan (W), Histidine (H) or Adenine (A) : -LW, bait/prey plasmid selection; -LWH, weak interaction; -LWHA, strong interaction. Picture was taken after 3 days. HSP90-1 ATPase domain (residue 1-207); SGT1b<sup>eta3</sup> (residue 1-322). AD, GAL4 activation domain; BD, GAL4 DNA binding domain.

**(A)** Interaction studies with RAR1, HSP90-1, SGT1b and HSC70-1.

**(B)** Interaction studies with SGT1b and HSP90-1.

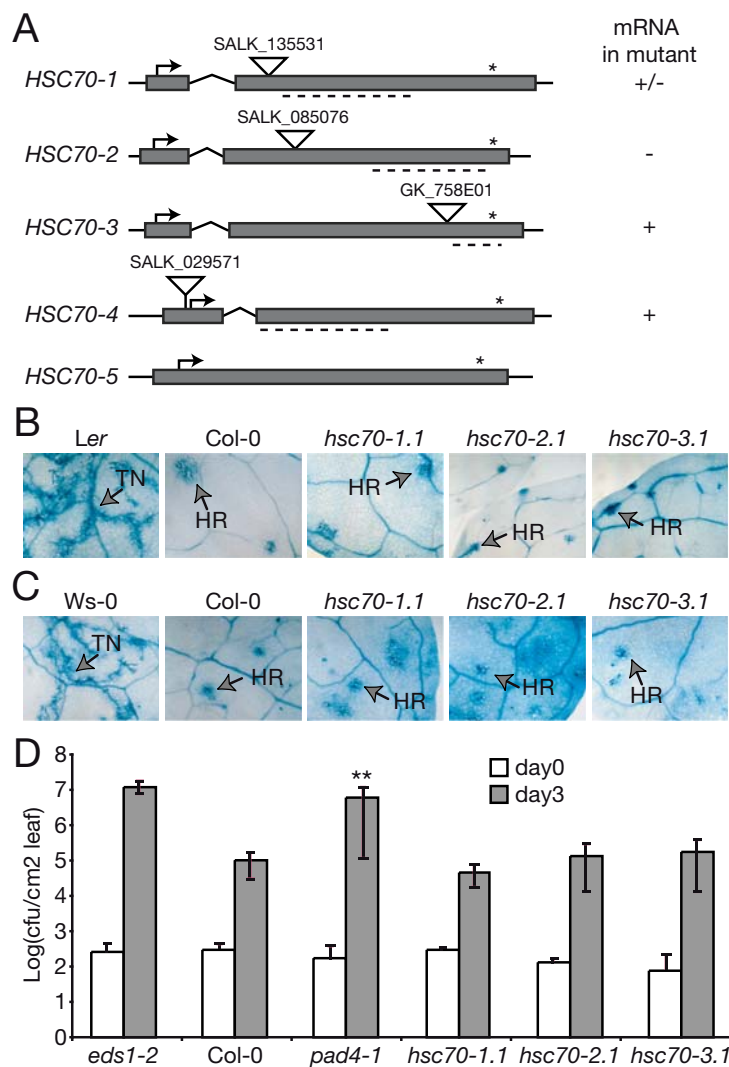

**Supplemental Figure 4 online.** Individual loss of *Arabidopsis* HSC70 isoforms 1, 2 or 3 does not affect plant immune responses

**(A)** Schematic representation of the intron (chevron) -exon (grey bar) structure of the five *Arabidopsis* cytosolic HSC70 genes. Arrows indicate translation starts and asterixes the stop codons. Triangles indicate the sites of T-DNA insertions in accession Col-0. Dashed lines mark the regions chosen for RT-PCR analysis of gene expression. Expression results of homozygous T-DNA lines are shown: (+) wild-type; (+/-) reduced; (-) not detectable.

*Arabidopsis* T-DNA insertion lines were inoculated with avirulent *H. parasitica* isolates Cala2 **(B)** or Emwa1 **(C)** and infection measured by trypan blue staining at 6 dpi. Ler and Ws-0 plants are susceptible to Cala2 and Emwa, respectively. HR, hypersensitive response; TN, trailing necrosis.

**(D)** Bacterial growth of virulent *Pst* DC3000 after vacuum infiltration of different lines, as indicated. The *eds1-2* (Ler) and *pad4-1* (Col) mutations compromise basal resistance. Each data point was analysed in triplicate and errors bars indicate standard errors. \*\*, statistically significant differences for values compared with wild type Col-0 as determined by student's *t*-test ( $p < 0,005$ ).

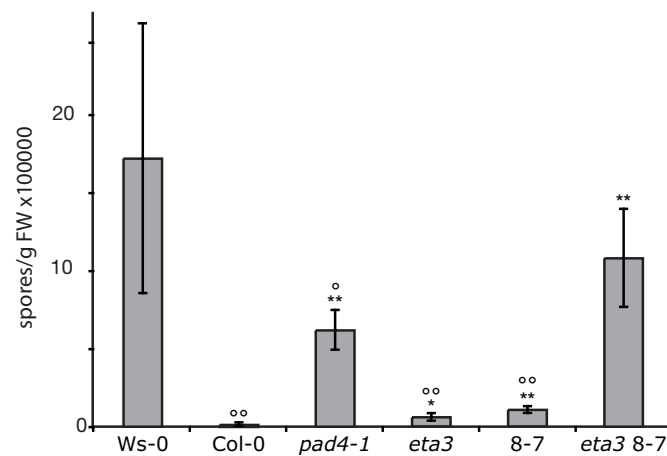

**Supplemental Figure 5 online.** *SGT1b* loss-of-function and *HSC70-1* over expression have additive effects on *R* gene-mediated resistance to *H. parasitica*.

Two-week-old *Arabidopsis* seedlings were inoculated with avirulent *H. parasitica* isolates Emwa1. Spores were counted 6 dpi. Ws-0 plants are susceptible to Emwa1. The *pad4-1* (Col) mutation compromises *R* gene-mediated resistance. Each data point is the average of two independent experiments with duplicate measurements. Error bars indicate standard errors. \* and \*\*, statistically significant differences for values compared with wild type Col-0 as determined by student's *t*-test ( $p < 0,05$  and  $p < 0,005$  respectively). ° and °°, statistically significant differences for values compared with line *eta3* 8-7 as determined by student's *t*-test ( $p < 0,05$  and  $p < 0,005$  respectively).

**SUPPLEMENTAL TABLE**

**Supplemental Table 1 online.** Tryptic fragments observed by mass spectrometry of 70-kDa proteins co-purified with over expressed SGT1b-Strep.

| Peptide        | m/z                | Charge | HSC70 isoform |         |         |         |         |
|----------------|--------------------|--------|---------------|---------|---------|---------|---------|
|                |                    |        | HSC70-1       | HSC70-2 | HSC70-3 | HSC70-4 | HSC70-5 |
| A              | 559,2              | 3      | T24           | T23     | T24     | T24     | T26     |
| B              | 608,3 <sup>b</sup> | 3      | T19           |         | T19     |         |         |
| C              | 615,8 <sup>b</sup> | 2      | T10           |         |         |         |         |
| D              | 639,8              | 2      | T25           | T24     | T25     | T25     |         |
| E              | 648,4 <sup>b</sup> | 2      |               |         | T39     |         |         |
| F              | 657,3              | 2      | T39           |         |         |         |         |
| G              | 653,8 <sup>b</sup> | 2      | T16           |         |         |         |         |
| H              | 654,8 <sup>b</sup> | 2      |               |         | T16     |         |         |
| I <sup>a</sup> | 679,8 <sup>b</sup> | 2      | T71           | T70     | T71     | T71     |         |
| J              | 737,4              | 2      | T4            | T4      | T4      | T4      |         |
| K              | 824,4              | 2      | T6            | T6      |         |         |         |
| L              | 840,5              | 2      | T17           | T16     | T17     | T17     | T18     |
| M              | 962,5 <sup>b</sup> | 3      | T53-54        |         | T53-54  |         |         |

<sup>a</sup> The corresponding peptide containing an oxidized methionine was also observed

<sup>b</sup> Confirmed by MS-MS
